# Supplementary material for: Assessment of Nutritional Knowledge and Body Mass Index Status among Students in Nigeria: A Cross-Sectional Study
Source: Research Square preprint supplement (doi:10.21203/rs.3.rs-6599100/v1), 2025-05-20
Supplement: Supplementary file 1 [file b6cf43844480cc3f545c084d.pdf]

## RESEARCH QUESTIONNAIRE

### Socio-Demographic

|   |                                        |                                                                                                                                                    |
|---|----------------------------------------|----------------------------------------------------------------------------------------------------------------------------------------------------|
| 1 | <b>Gender</b>                          | <input type="checkbox"/> Male<br><input type="checkbox"/> Female                                                                                   |
| 2 | <b>Age</b>                             | (                      )                                                                                                                           |
| 3 | <b>Religion</b>                        | <input type="checkbox"/> Christianity<br><input type="checkbox"/> Islam<br><input type="checkbox"/> Traditional<br><input type="checkbox"/> Others |
| 4 | <b>Marital Status</b>                  | <input type="checkbox"/> Single<br><input type="checkbox"/> Married                                                                                |
| 5 | <b>Current class/level</b>             |                                                                                                                                                    |
| 6 | <b>Family type</b>                     | <input type="checkbox"/> Polygamous<br><input type="checkbox"/> monogamous                                                                         |
| 7 | <b>Average monthly stipend (Naira)</b> | <input type="checkbox"/> Less than #20000<br><input type="checkbox"/> #21000 - #50000<br><input type="checkbox"/> More than #50000                 |

### Anthropometric parameters

|                                 |  |
|---------------------------------|--|
| <b>Body weight (kg)</b>         |  |
| <b>Body height (cm)</b>         |  |
| <b>Waist circumference (cm)</b> |  |

### Eating Habits in The Past Week (Fill in answers appropriately)

|                  | Number of meals at home in the past week | Number of meals in school canteen/restaurants in the past week |
|------------------|------------------------------------------|----------------------------------------------------------------|
| <b>Breakfast</b> |                                          |                                                                |
| <b>Lunch</b>     |                                          |                                                                |
| <b>Dinner</b>    |                                          |                                                                |

**Nutritional knowledge (Choose one correct answer)**

|    |                                                                                          |                                                                                                                                                                                                     |
|----|------------------------------------------------------------------------------------------|-----------------------------------------------------------------------------------------------------------------------------------------------------------------------------------------------------|
| 1  | Which of the following nutrients provide energy after ingesting it from food?            | <input type="checkbox"/> Fats<br><input type="checkbox"/> Calcium<br><input type="checkbox"/> Vitamin C                                                                                             |
| 2  | Meat, fish, egg are rich in?                                                             | <input type="checkbox"/> Protein<br><input type="checkbox"/> Carbohydrates<br><input type="checkbox"/> Vitamin K                                                                                    |
| 3  | What should be considered most while choosing food?                                      | <input type="checkbox"/> Nutrient content of foods<br><input type="checkbox"/> Color of foods<br><input type="checkbox"/> Price of foods                                                            |
| 4  | Eating too much of oily and fatty foods can mostly lead to which of the health problems? | <input type="checkbox"/> Headache<br><input type="checkbox"/> Heart diseases<br><input type="checkbox"/> Cancer                                                                                     |
| 5  | Which of the following foods are rich in vitamins?                                       | <input type="checkbox"/> Vegetables & fruits<br><input type="checkbox"/> Meats<br><input type="checkbox"/> Milk                                                                                     |
| 6  | Which of the following foods has high content of fiber?                                  | <input type="checkbox"/> Spinach vegetable<br><input type="checkbox"/> Potatoes<br><input type="checkbox"/> Watermelon                                                                              |
| 7  | Which of the following nutrient provides the highest amounts of energy?                  | <input type="checkbox"/> Carbohydrates<br><input type="checkbox"/> Fat<br><input type="checkbox"/> Alcohol                                                                                          |
| 8  | In your opinion, what is a “balanced diet”?                                              | <input type="checkbox"/> A diet without carbohydrates<br><input type="checkbox"/> A diet containing all nutrients in proper quantities and ratio<br><input type="checkbox"/> A diet rich in calcium |
| 9  | What are the functions of vitamins and minerals?                                         | <input type="checkbox"/> To put on muscular tissue<br><input type="checkbox"/> To catalyze biochemical reactions in the body<br><input type="checkbox"/> To provide energy                          |
| 10 | Fruits are richest in?                                                                   | <input type="checkbox"/> Calcium<br><input type="checkbox"/> Vitamins<br><input type="checkbox"/> Sugar                                                                                             |
